# Supplementary material for: Isolation, Characterization, Antioxidant Activity, Metal-Chelating Activity, and Protein-Precipitating Capacity of Condensed Tannins from Plum (Prunus salicina) Fruit
Source: MDPI journal article supplement (doi:10.3390/antiox11040714), 2022-04-05
Supplement: s1 [file s1]

### Supplemental materials:

**Figure S1.**  $^{13}\text{C}$  NMR spectrum of condensed tannins extracted from plum pericarp.

**Figure S2.** The quenching effects of  $\text{Zn}^{2+}$ ,  $\text{Cu}^{2+}$ ,  $\text{Al}^{3+}$ , and  $\text{Fe}^{3+}$  on the PCT fluorescence intensity at a pH of 6.0, achieved with an acetate buffer, at 294.82 K;  $\lambda_{\text{ex}} = 280 \text{ nm}$ .

**Figure S3.** The quenching effects of  $\text{Al}^{3+}$  and  $\text{Fe}^{3+}$  on the PCT fluorescence intensity at a pH of 2.1 or 7.4 at 294.82 K;  $\lambda_{\text{ex}} = 280 \text{ nm}$ .

**Figure S4.** The quenching efficiencies of different concentrations of  $\text{Al}^{3+}$  and  $\text{Fe}^{3+}$  on PCT. The quenching efficiency was obtained by plotting  $[(F_0 - F) \times 100/F_0]$  versus the metal ion concentration.

**Figure S5.** Modified Stern–Volmer plots for quenching of the PCT fluorescence by (a)  $\text{Cu}^{2+}$  and (b)  $\text{Fe}^{2+}$  at a pH of 6.0. (c) Stern–Volmer plot for PCT fluorescence quenching by  $\text{Al}^{3+}$  or  $\text{Fe}^{3+}$  at a pH of 2.1 or 7.4. (d) Comparison of Stern–Volmer constants ( $K_a$ ) of the PCT fluorescence quenching by  $\text{Al}^{3+}$  or  $\text{Fe}^{3+}$  at a pH of 2.1, 6.0, or 7.4.

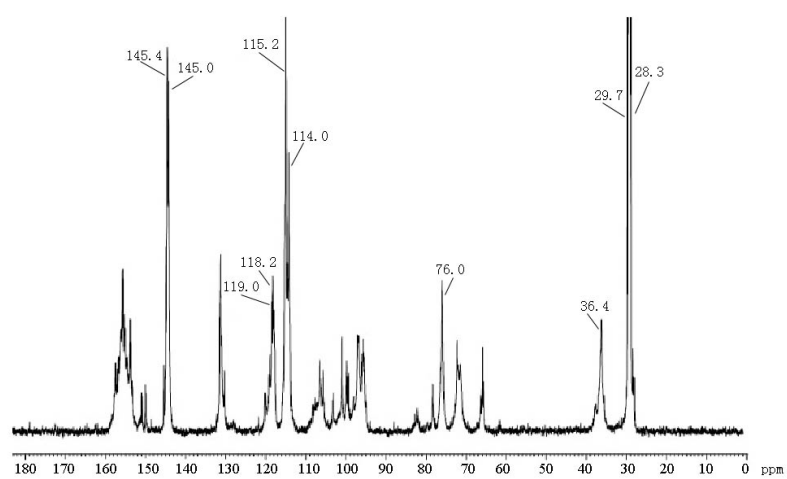

Figure S1

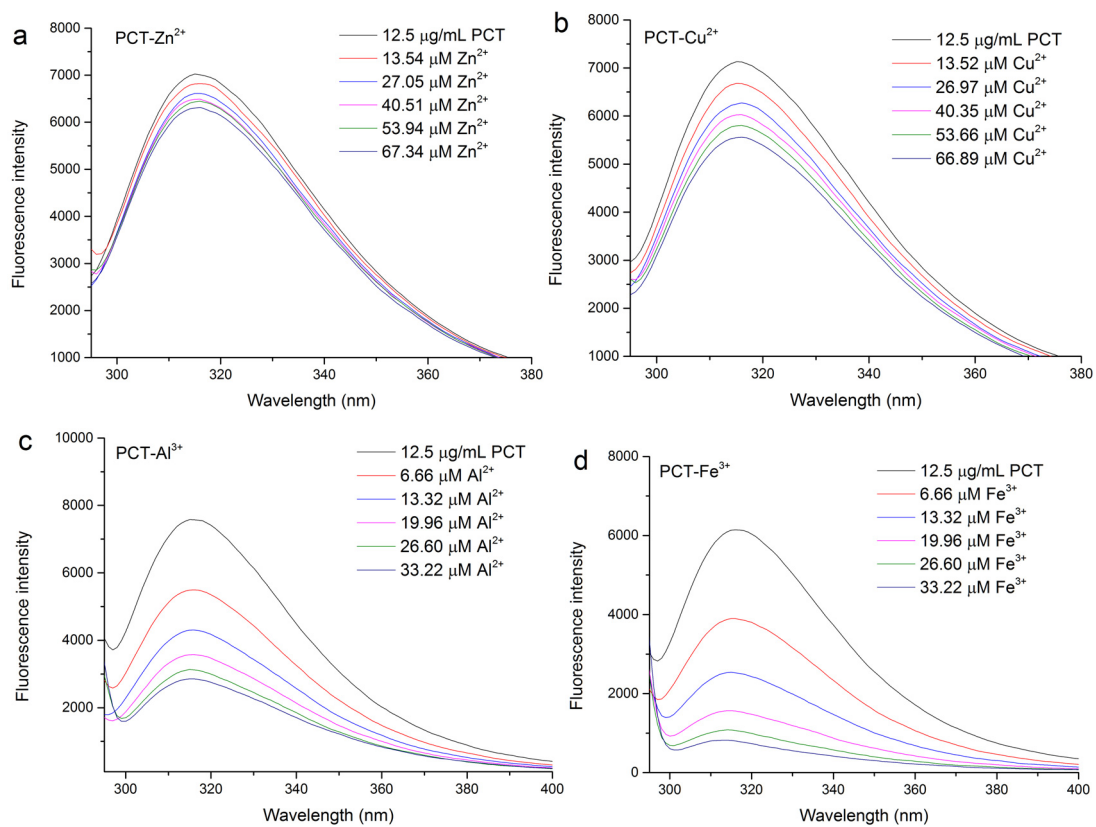

Figure S2

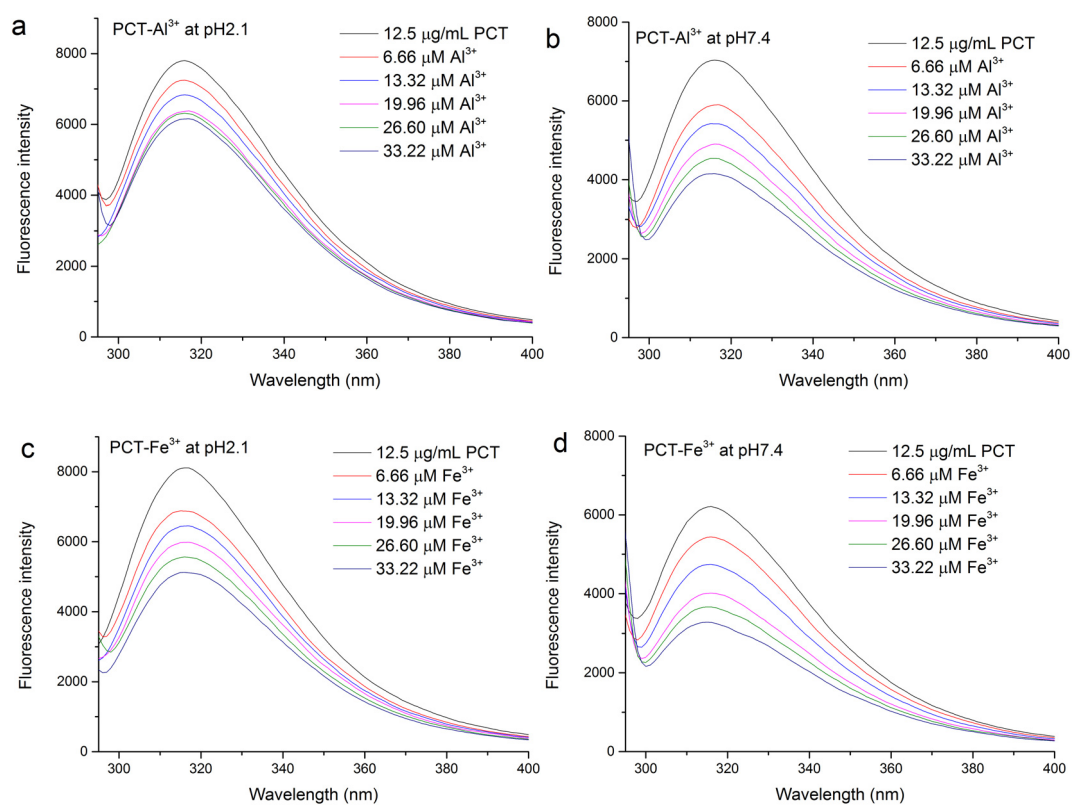

Figure S3

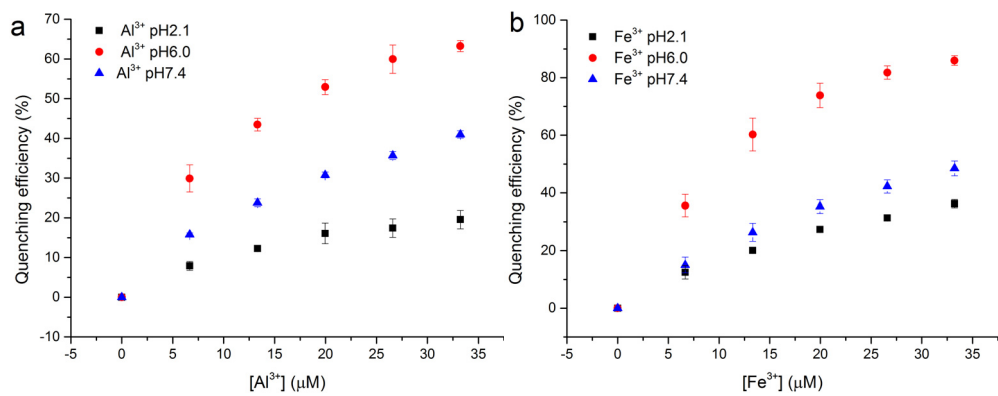

Figure S4

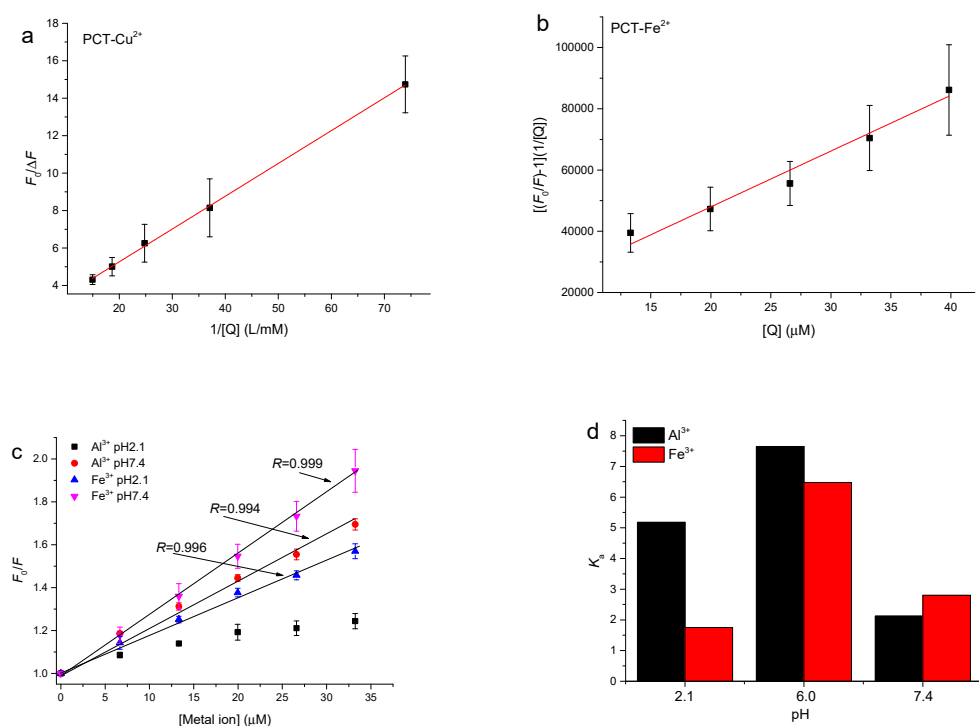

Figure S5
